# Supplementary material
Source: PubMed Central journal article supplement (PMC3903353)

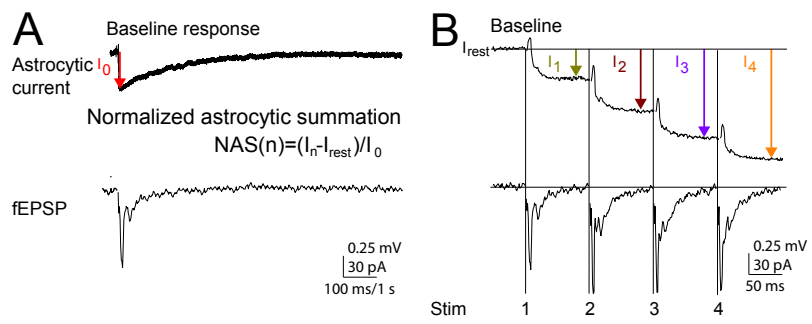

Figure S1

Supplement: tjp0592-0087-sd1.pdf [file tjp0592-0087-sd1.pdf]

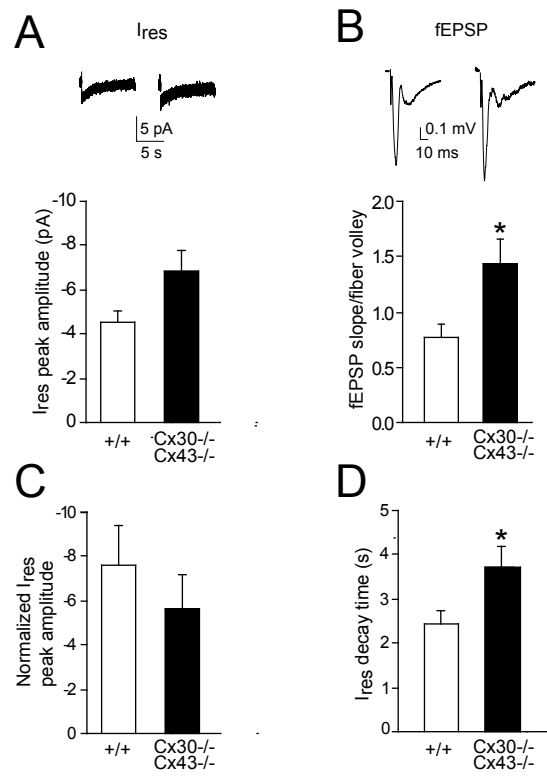

Figure S2

Supplement: tjp0592-0087-sd2.pdf [file tjp0592-0087-sd2.pdf]
